# Supplementary material for: Dietary Intake of Polyphenols or Polyunsaturated Fatty Acids and Its Relationship with Metabolic and Inflammatory State in Patients with Type 2 Diabetes Mellitus
Source: MDPI journal article supplement (doi:10.3390/nu14051083), 2022-03-04
Supplement: s1 [file s1]

**Dietary intake of polyphenols or polyunsaturated fatty acids and its relationship with metabolic and inflammatory state in patients with type 2 diabetes mellitus.**

**Marcin Kosmalski <sup>1</sup>, Anna Pękala-Wojciechowska <sup>2</sup>, Agnieszka Sut <sup>3</sup>, Tadeusz Pietras <sup>4</sup> and Bogusława Luzak <sup>5,\*</sup>**

Table S1. The Bland-Altman analysis for total polyphenol and total fatty acid intake

|                    | Polyphenols | Fatty acids | Desired value |
|--------------------|-------------|-------------|---------------|
| Percent change [%] | 2,69        | 1,79        | <5            |

Percent change was estimated using Bland-Altman method.

Table S2. The analysis for different fatty acid compound intake estimated by FFQ1 and FFQ2

| Fatty acids   | Percent change [%] | Correlation coefficient (Rs) |
|---------------|--------------------|------------------------------|
| SFA           | 2,15               | 0,99                         |
| MUFA          | 1,08               | 0,97                         |
| EPA+DHA       | 3,23               | 0,99                         |
| OMEGA-3       | 2,15               | 0,95                         |
| OMEGA-6       | 1,08               | 0,96                         |
| PUFA          | 1,08               | 0,93                         |
| Desired value | <5                 | >0,8                         |

The percent change was determined with Bland-Altman method and correlation coefficient was determined by using Spearman rank correlation method.

SFA – saturated fatty acids, MUFA – monounsaturated fatty acids, PUFA – polyunsaturated fatty acids, EPA – eicosapentaenoic acid; DHA - docosahexaenoic acid

Table S3. The analysis for different phenolic compound intake estimated by FFQ1 and FFQ2

| Polyphenols   | Percent change [%] | Correlation coefficient (Rs) |
|---------------|--------------------|------------------------------|
| Polyphenols   | 2,69               | 0,997                        |
| Flavonoids    | 4,30               | 0,993                        |
| Flawan-3-ols  | 2,15               | 0,987                        |
| Fenolic acids | 2,15               | 0,958                        |
| Stilbens      | 2,15               | 0,870                        |
| Lignans       | 1,08               | 0,975                        |
| Desired value | <5                 | >0,8                         |

The percent change was determined with Bland-Altman method and correlation coefficient was determined by using Spearman rank correlation method.

Table S4. Demographic and clinical characteristics of T2DM patients (n=129)

| Demographic variables         | n (%)     |
|-------------------------------|-----------|
| Gender:                       |           |
| female                        | 80 (62)   |
| male                          | 49 (38)   |
| Educational level:            |           |
| low                           | 45 (35)   |
| medium                        | 65 (50)   |
| high                          | 19 (15)   |
| Physical activity level:      |           |
| low                           | 80(62)    |
| medium                        | 38 (29)   |
| high                          | 11 (9)    |
| Current smoking               | 19 (15)   |
| Duration of diabetes*         | 3 (0; 27) |
| Following a diabetic diet     | 94 (73)   |
| Familial diabetes             | 54 (42)   |
| Diabetes complication:        |           |
| polyneuropathy                | 16 (12)   |
| retinopathy                   | 16 (12)   |
| diabetic kidney disease       | 25 (19)   |
| diabetic foot                 | 4 (3)     |
| Diabetes treatment:           |           |
| Untreated                     | 12 (9)    |
| MET monotherapy               | 51 (40)   |
| PSU monotherapy               | 7 (5)     |
| Pioglitazone monotherapy      | 1 (<1)    |
| Insulin monotherapy           | 11 (8)    |
| MET with SU                   | 26 (20)   |
| MET with SGLT2 inhibitors     | 4 (3)     |
| MET with insulin              | 12 (9)    |
| MET with IDPP-4               | 1 (<1)    |
| MET with IDPP-4 and SU        | 1 (<1)    |
| MET with acarbose and insulin | 1 (<1)    |
| MET with SU and insulin       | 1 (<1)    |
| SU with IDPP-4 and insulin    | 1 (<1)    |

\*Data for Duration of diabetes are shown as a median (minimum; maximum). IDPP-4 – dipeptidyl peptidase-4 inhibitors, MET – metformin, SGLT2 - sodium-glucose cotransporter protein-2, SU – sulfonylureas.

**Table S5.** Descriptive characteristic of dietary intake of key food components

|                      | Mean | SD   | Minimum | 25 <sup>th</sup> | Median | 75 <sup>th</sup> | Maximum |
|----------------------|------|------|---------|------------------|--------|------------------|---------|
| Polyphenols [mg/day] |      |      |         |                  |        |                  |         |
| total                | 1632 | 901  | 81      | 964              | 1656   | 2076             | 4723    |
| flavonoids           | 810  | 478  | 8       | 408              | 793    | 1118             | 2392    |
| flavan-3-ols         | 452  | 310  | 4       | 221              | 432    | 648              | 2161    |
| phenolic acids       | 403  | 298  | 21      | 208              | 305    | 543              | 1655    |
| stilbenes            | 0.67 | 1.15 | 0.00    | 0.03             | 0.19   | 0.74             | 6.63    |
| lignans              | 34.6 | 67.9 | 0.8     | 9.0              | 18.0   | 36.7             | 559.2   |
| Fas [g/day]          |      |      |         |                  |        |                  |         |
| SFA                  | 29.4 | 20.1 | 1.5     | 18.7             | 26.1   | 35.7             | 179.8   |
| MUFA                 | 39.1 | 24.8 | 1.8     | 21.9             | 36.4   | 49.0             | 172.9   |
| Total PUFA           | 19.4 | 14.9 | 1.8     | 9.4              | 16.8   | 26.0             | 122.8   |
| PUFA omega 3         | 3.4  | 3.2  | 0.2     | 1.4              | 2.4    | 3.9              | 19.3    |
| PUFA omega 6         | 15.1 | 12.0 | 1.5     | 7.2              | 12.8   | 19.6             | 101.5   |
| EPA + DHA            | 0.65 | 0.96 | 0.00    | 0.19             | 0.33   | 0.69             | 6.77    |
| Omega 6/3 proportion | 5.6  | 2.9  | 0.7     | 3.4              | 5.3    | 6.9              | 18.8    |
| Cholesterol [mg/day] | 311  | 199  | 19      | 177              | 272    | 375              | 911     |

DHA - docosahexaenoic acid, EPA – eicosapentaenoic acid, Fas - fatty acids, MUFA – monounsaturated fatty acids, PUFA - polyunsaturated fatty acids, SFA – saturated fatty acids.

**Table S6.** Biochemical, haematological and anthropometric parameters (n=129)

|                                       | Mean  | SD    | Minimum | 25th  | Median | 75 <sup>th</sup> | Maximum |
|---------------------------------------|-------|-------|---------|-------|--------|------------------|---------|
| FG [mg/dl]                            | 133   | 37    | 82      | 108   | 122    | 149              | 302     |
| HbA <sub>1c</sub> [%]                 | 6.8   | 1.3   | 5.2     | 5.9   | 6.5    | 7.2              | 12.8    |
| TCH [mg/dl]                           | 182   | 51    | 98      | 149   | 180    | 209              | 332     |
| LDL-CH [mg/dl]                        | 106   | 42    | 22      | 76    | 101    | 128              | 253     |
| HDL-CH cholesterol [mg/dl]            | 51    | 15    | 29      | 40    | 49     | 57               | 117     |
| TG [mg/dl]                            | 155   | 74    | 66      | 103   | 133    | 183              | 651     |
| ALT [U/l]                             | 28    | 17    | 11      | 19    | 25     | 33               | 163     |
| AST [U/l]                             | 26    | 10    | 10      | 19    | 23     | 31               | 64      |
| Serum creatinine [mg/dl]              | 0.89  | 0.35  | 0.42    | 0.69  | 0.81   | 1.01             | 2.83    |
| Leucocytes [x10 <sup>3</sup> /μl]     | 7.75  | 1.79  | 4.10    | 6.30  | 7.60   | 9.10             | 13.00   |
| Lymphocytes [x10 <sup>3</sup> /μl]    | 2.18  | 0.71  | 0.70    | 1.80  | 2.10   | 2.60             | 4.79    |
| Neutrophils [x10 <sup>3</sup> /μl]    | 4.70  | 1.46  | 2.10    | 3.60  | 4.60   | 5.64             | 9.00    |
| Erythrocytes [x10 <sup>6</sup> /μl]   | 4.74  | 0.51  | 3.22    | 4.43  | 4.76   | 5.08             | 5.83    |
| Haemoglobin [g/l]                     | 14.2  | 1.4   | 9.6     | 13.4  | 14.4   | 15.0             | 17.3    |
| Haematocrit [%]                       | 42.2  | 3.9   | 30.2    | 40.2  | 42.7   | 44.7             | 50.7    |
| Platelet count [x10 <sup>3</sup> /μl] | 242   | 69    | 43      | 200   | 234    | 280              | 571     |
| Mean platelet volume [fl]             | 10.5  | 1.0   | 8.3     | 9.7   | 10.4   | 11.2             | 13.1    |
| PLR                                   | 122   | 54    | 43      | 85    | 112    | 141              | 389     |
| NLR                                   | 2.41  | 1.21  | 0.44    | 1.58  | 2.21   | 2.89             | 8.56    |
| MPVLR                                 | 5.40  | 2.09  | 2.42    | 4.03  | 4.86   | 6.11             | 13.57   |
| SBP [mmHg]                            | 140   | 17    | 100     | 129   | 140    | 151              | 185     |
| DBP [mmHg]                            | 80    | 10    | 60      | 74    | 80     | 85               | 110     |
| BMI                                   | 33.1  | 7.7   | 18.2    | 28.2  | 32.4   | 36.4             | 60.5    |
| Waist circumference                   | 110   | 16    | 74      | 102   | 110    | 118              | 168     |
| WHR                                   | 0.966 | 0.077 | 0.775   | 0.921 | 0.966  | 1.018            | 1.137   |

ALT - alanine aminotransferase activity, AST - aspartate aminotransferase activity, BMI – body mass index, DBP- diastolic blood pressure, FG- fasting glucose concentration, HbA<sub>1c</sub> – glycated haemoglobin, HDL-CH – HDL-cholesterol, LDL-CH – LDL-cholesterol, MPVLR - mean platelet volume-to-lymphocyte ratio, NLR - neutrophil-to-lymphocyte ratio, PLR - platelet-to-lymphocyte ratio; SBP – systolic blood pressure, TCH - total cholesterol, TG - triglycerides WHR – waist-to-hip ratio.
